# Supplementary material for: Field Experiment on the Profit Implications of Merchants’ Discretionary Power to Override Data-Driven Decision-Making Tools
Source: Atypon-hosted journal article supplement (doi:10.1287/mnsc.2020.3743), 2020-08-28
Supplement: mnsc.2020.3743.sm1.pdf [file mnsc.2020.3743.sm1.pdf]

**WEB APPENDIX 1**  
**Figure WA1: Distribution of Store Count by SKUs**

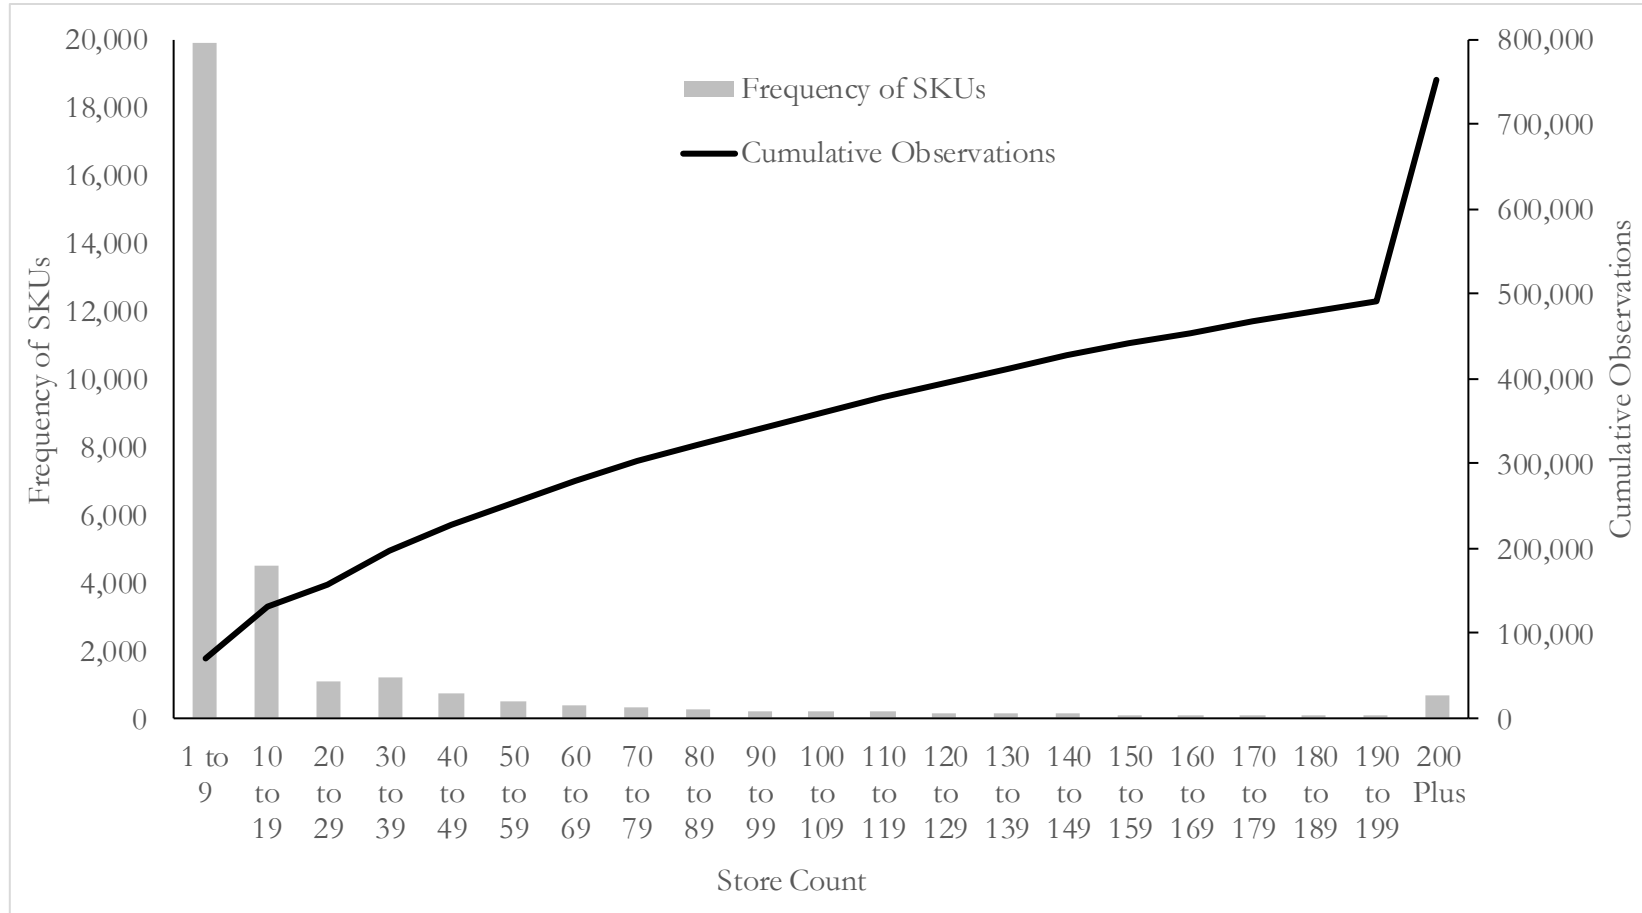

**WEB APPENDIX 2**

**Figure WA2: Profitability Impact: Interaction between Test Group and PLC**

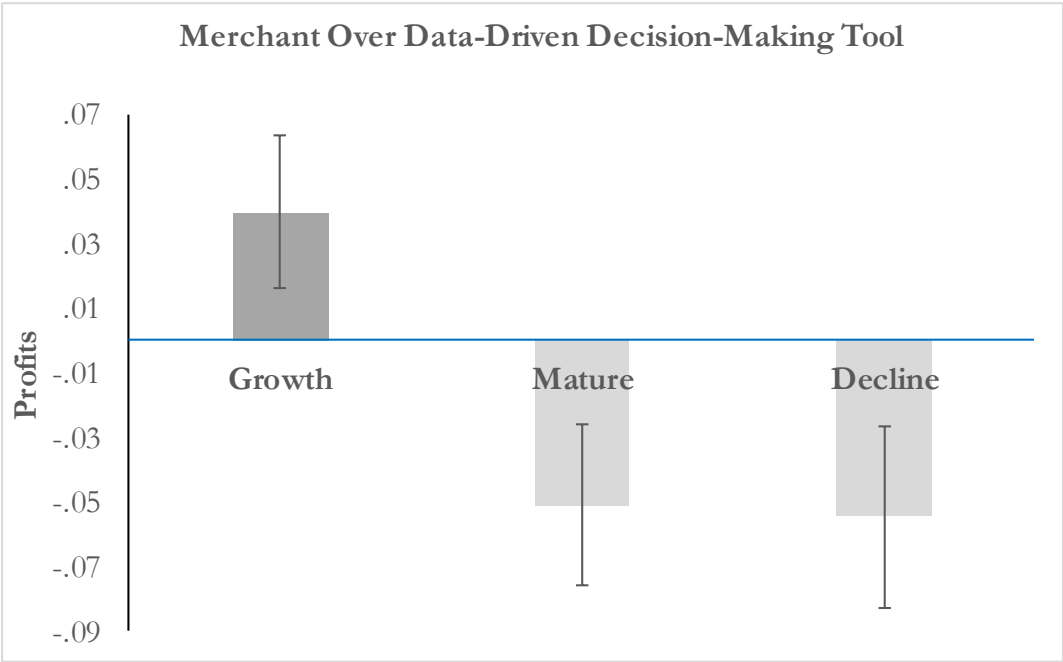

WEB APPENDIX 3

RESULTS FOR ALTERNATE EXPLANATION

**Table WA1: Avoiding Potential SKU Complementarities**

| Dependent Variable<br>- $PRFT_{ij}$ | Parameter           | RCT3_ALT1 |       | RCT6_ALT1       |       |
|-------------------------------------|---------------------|-----------|-------|-----------------|-------|
|                                     |                     | Coeff.    | S.E.  | Coeff.          | S.E.  |
| $TEST_{ij}$ (DDD Tool)              | $\beta_1$           | .0072*    | .0040 | -.0392***       | .0103 |
| $MATURE_i$                          | $\beta_2$           |           |       | NA <sup>1</sup> |       |
| $DECLINE_i$                         | $\beta_3$           |           |       | NA <sup>1</sup> |       |
| $TEST_{ij} * MATURE_i$              | $\beta_4$           |           |       | .0497***        | .0114 |
| $TEST_{ij} * DECLINE_i$             | $\beta_5$           |           |       | .0547***        | .0110 |
|                                     | $\beta_1 + \beta_4$ |           |       | .0104**         | .0051 |
|                                     | $\beta_1 + \beta_5$ |           |       | .0154***        | .0041 |
| <i>SKU Fixed Effects</i>            | $\beta_i$           | YES       |       | YES             |       |
| <i>Store Fixed Effects</i>          | $\beta_j$           | YES       |       | YES             |       |
| <i>No. of SKUs</i>                  |                     | 4,320     |       | 4,320           |       |
| <i>N</i>                            |                     | 492,151   |       | 492,151         |       |

Note: \*  $p < .10$ ; \*\*  $p < .05$ ; \*\*\*  $p < .01$ ; <sup>1</sup>The main effect of PLC stages cannot be separately identified from SKU fixed effects.

## WEB APPENDIX 4

### ROBUSTNESS CHECKS

*Subsample Analyses.* Our identification strategy is reliant on the randomization of stores within an SKU. However, the effectiveness of randomization is sensitive to the available sample. When an SKU is flagged for removal at a small number of stores, the distribution of stores between test and control group may not be ideal. We test the sensitivity of our results to this assumption by performing subsample analyses on SKUs flagged for removal in all stores (i.e. for SKUs that were flagged in fewer than 30 stores were assigned to control condition by the firm), at least 40 stores, and at least 50 stores. Please note that main analyses is based on SKUs that were flagged for removal in at least 30 stores, thus permitting enough sample for treatment condition (i.e. six stores). The results are reported below and are consistent with the main results.

**Table WA2: Robustness Test: Subsample Analyses Based on Store Count**

| Dependent Variable - $PRFT_{ij}$ | Parameter           | RCT3_ALT2         |                   |                   | RCT6_ALT2            |                      |                      |
|----------------------------------|---------------------|-------------------|-------------------|-------------------|----------------------|----------------------|----------------------|
|                                  |                     | Entire Sample     | >40 Stores        | >50 Stores        | Entire Sample        | >40 Stores           | >50 Stores           |
| $TEST_{ij}$ (DDD Tool)           | $\beta_1$           | .0092*<br>(.0048) | .0076*<br>(.0040) | .0073*<br>(.0042) | -.0523***<br>(.0141) | -.0412***<br>(.0106) | -.0418***<br>(.0109) |
| $MATURE_i$                       | $\beta_2$           |                   |                   |                   | NA <sup>1</sup>      | NA <sup>1</sup>      | NA <sup>1</sup>      |
| $DECLINE_i$                      | $\beta_3$           |                   |                   |                   | NA <sup>1</sup>      | NA <sup>1</sup>      | NA <sup>1</sup>      |
| $TEST_{ij} * MATURE_i$           | $\beta_4$           |                   |                   |                   | .0659***<br>(.0153)  | .0522***<br>(.0117)  | .0525***<br>(.0122)  |
| $TEST_{ij} * DECLINE_i$          | $\beta_5$           |                   |                   |                   | .0710***<br>(.0147)  | .0574***<br>(.0114)  | .0587***<br>(.0119)  |
|                                  | $\beta_1 + \beta_4$ |                   |                   |                   | .0135**<br>(.0061)   | .0109**<br>(.0051)   | .0107**<br>(.0053)   |
|                                  | $\beta_1 + \beta_5$ |                   |                   |                   | .0187***<br>(.0047)  | .0162***<br>(.0042)  | .0169***<br>(.0044)  |
| <i>SKU Fixed Effects</i>         | $\beta_i$           |                   | YES               |                   |                      | YES                  |                      |
| <i>Store Fixed Effects</i>       | $\beta_j$           |                   | YES               |                   |                      | YES                  |                      |
| <i>No. of SKUs</i>               |                     | 30,731            | 3,362             | 2,827             | 30,731               | 3,362                | 2,827                |
| <i>N</i>                         |                     | 753,409           | 506,120           | 481,918           | 753,409              | 506,120              | 481,918              |

Note: \*  $p < .10$ ; \*\*  $p < .05$ ; \*\*\*  $p < .01$ ; Standard errors in parentheses; <sup>1</sup>The main effect of PLC stages cannot be separately identified from SKU fixed effects.

*Sensitivity to Inventory Holding Cost Assumption.* For our primary analysis, we use inventory holding cost measured used by the management of the company, i.e. 25% of cost of the product. We perform robustness tests by considering other inventory holding costs, which at 20% and 30% of the cost of the product. The results from these analyses are reported below and our conclusions remain unchanged.

**Table WA3: Robustness Test: Sensitivity to Inventory Holding Cost**

| Dependent Variable - $PRFT_{ij}$ | Parameter           | RCT3_ALT3          |                   | RCT6_ALT3            |                      |
|----------------------------------|---------------------|--------------------|-------------------|----------------------|----------------------|
|                                  |                     | 20% of Cost        | 30% of Cost       | 20% of Cost          | 30% of Cost          |
| $TEST_{ij}$ (DDD Tool)           | $\beta_1$           | .0097**<br>(.0038) | .0066*<br>(.0038) | -.0495***<br>(.0120) | -.0326***<br>(.0087) |
| $MATURE_i$                       | $\beta_2$           |                    |                   | NA <sup>1</sup>      | NA <sup>1</sup>      |
| $DECLINE_i$                      | $\beta_3$           |                    |                   | NA <sup>1</sup>      | NA <sup>1</sup>      |
| $TEST_{ij} * MATURE_i$           | $\beta_4$           |                    |                   | .0636***<br>(.0129)  | .0419***<br>(.0100)  |
| $TEST_{ij} * DECLINE_i$          | $\beta_5$           |                    |                   | .0673***<br>(.0126)  | .0456***<br>(.0093)  |
|                                  | $\beta_1 + \beta_4$ |                    |                   | .0142***<br>(.0047)  | .0093*<br>(.0050)    |
|                                  | $\beta_1 + \beta_5$ |                    |                   | .0178***<br>(.0043)  | .0130***<br>(.0033)  |
| <i>SKU Fixed Effects</i>         | $\beta_i$           | YES                |                   | YES                  |                      |
| <i>Store Fixed Effects</i>       | $\beta_j$           | YES                |                   | YES                  |                      |
| <i>No. of SKUs</i>               |                     | 4,397              |                   | 4,397                |                      |
| <i>N</i>                         |                     | 541,836            |                   | 541,836              |                      |

Note: \*  $p < .10$ ; \*\*  $p < .05$ ; \*\*\*  $p < .01$ ; <sup>1</sup>The main effect of PLC stages cannot be separately identified from SKU fixed effects.

*Ignoring Leftover Inventory.* Our main results considered residual profits from leftover inventory. We recalculate profits ignoring the leftover inventory (see the figure below). The comparison of merchant’s intervention, i.e. keeping the SKUs in store, is made with the counterfactual of zero profits derived from SKUs, which are removed from the stores. The results from this analysis are reported below and are consistent with main results.

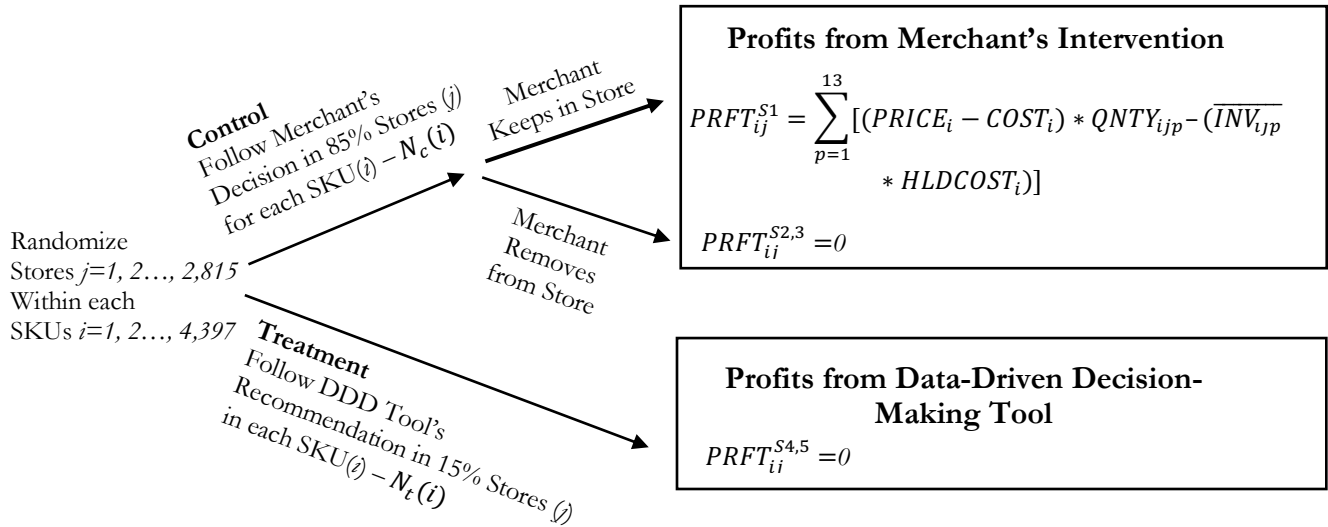

**Table WA4: Robustness Test: Ignoring Leftover Inventory**

| Dependent Variable - $PRFT_{ij}$ | Parameter           | RCT3_ALT4 |       | RCT6_ALT4       |       |
|----------------------------------|---------------------|-----------|-------|-----------------|-------|
|                                  |                     | Coeff.    | S.E.  | Coeff.          | S.E.  |
| $TEST_{ij}$ (DDD Tool)           | $\beta_1$           | .0255***  | .0026 | -.0627***       | .0166 |
| $MATURE_i$                       | $\beta_2$           |           |       | NA <sup>1</sup> |       |
| $DECLINE_i$                      | $\beta_3$           |           |       | NA <sup>1</sup> |       |
| $TEST_{ij} * MATURE_i$           | $\beta_4$           |           |       | .1010***        | .0168 |
| $TEST_{ij} * DECLINE_i$          | $\beta_5$           |           |       | .0834***        | .0163 |
|                                  | $\beta_1 + \beta_4$ |           |       | .0383***        | .0022 |
|                                  | $\beta_1 + \beta_5$ |           |       | .0207***        | .0025 |
| <i>SKU Fixed Effects</i>         | $\beta_i$           | YES       |       | YES             |       |
| <i>Store Fixed Effects</i>       | $\beta_j$           | YES       |       | YES             |       |
| <i>No. of SKUs</i>               |                     | 2,652     |       | 2,652           |       |
| <i>N</i>                         |                     | 390,185   |       | 390,185         |       |

Note: \*  $p < .10$ ; \*\*  $p < .05$ ; \*\*\*  $p < .01$ ; <sup>1</sup>The main effect of PLC stages cannot be separately identified from SKU fixed effects.

*Sensitivity to Outliers.* We perform robustness tests by winsorizing (i.e. using mid 98<sup>th</sup> percentile of data) the profits. Our results are robust to removal of extreme outliers.

**Table WA5: Robustness Test: Ignoring Outliers**

| Dependent Variable -<br>$PRFT_{ij}$ | Parameter           | RCT6_ALT5       |       |
|-------------------------------------|---------------------|-----------------|-------|
|                                     |                     | Coeff.          | S.E.  |
| $TEST_{ij}$ (DDD Tool)              | $\beta_1$           | -.0168***       | .0020 |
| $MATURE_i$                          | $\beta_2$           | NA <sup>1</sup> |       |
| $DECLINE_i$                         | $\beta_3$           | NA <sup>1</sup> |       |
| $TEST_{ij} * MATURE_i$              | $\beta_4$           | .0232***        | .0020 |
| $TEST_{ij} * DECLINE_i$             | $\beta_5$           | .0227***        | .0021 |
|                                     | $\beta_1 + \beta_4$ | .0065***        | .0004 |
|                                     | $\beta_1 + \beta_5$ | .0060***        | .0008 |
| <i>SKU Fixed Effects</i>            | $\beta_i$           | YES             |       |
| <i>Store Fixed Effects</i>          | $\beta_j$           | YES             |       |
| <i>No. of SKUs</i>                  |                     | 4,360           |       |
| <i>N</i>                            |                     | 530,974         |       |

Note: \*  $p < .10$ ; \*\*  $p < .05$ ; \*\*\*  $p < .01$ ; <sup>1</sup>The main effect of PLC stages cannot be separately identified from SKU fixed effects.
